# Supplementary material for: Enhanced photocatalytic degradation of Rhodamine B, antibacterial and antioxidant activities of green synthesised ZnO/N doped carbon quantum dot nanocomposites
Source: Royal Society of Chemistry journal article supplement (doi:10.1039/d1nj04036g), 2021-01-01
Supplement: d1nj04036g1.pdf [file d1nj04036g1.pdf]

## Green synthesis of nitrogen doped carbon quantum dots/zinc oxide nanocomposite for photocatalytic degradation of rhodamine B dye pollutant, antimicrobial and antioxidant activity

Aschalew Tadesse<sup>a\*</sup>, Mebrahtu Hagos<sup>b</sup>, Neway Belachew<sup>c</sup>, H C Ananda Murthy<sup>a</sup> and K. Basavaiah<sup>d</sup>

<sup>a</sup> Department of Applied Chemistry, Adama Science and Technology university, Adama-1888, Ethiopia

<sup>b</sup> Faculty of Natural and Computational Sciences, Woldia University, Woldia-400, Ethiopia

<sup>c</sup> Department of Chemistry, Debre Berhan University, Debre Berhan, Ethiopia

<sup>d</sup> Department of Inorganic and Analytical Chemistry, Andhra University, Visakhapatnam-530003, India

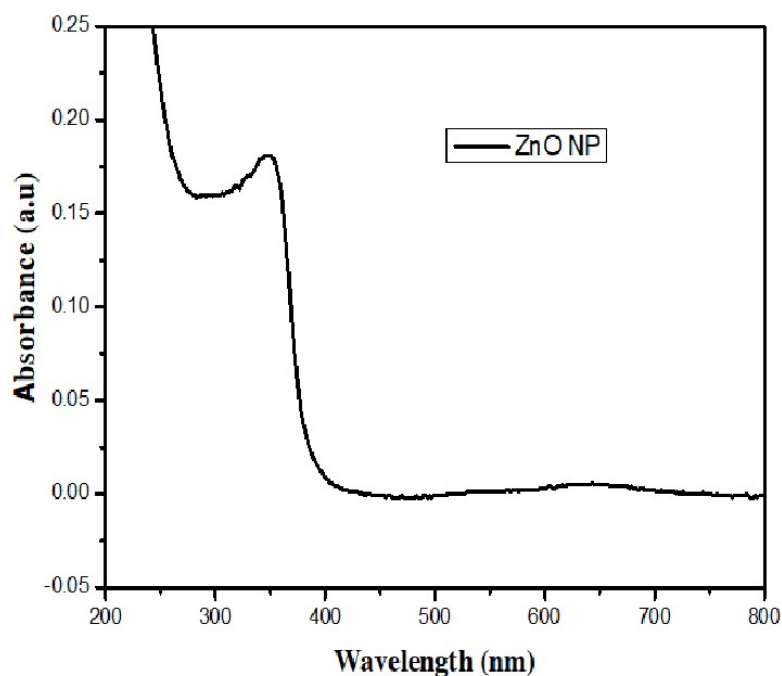

Figure S1: UV-Vis Spectra of ZnO NPs
